# Supplementary material for: KCC2 overexpression prevents the paradoxical seizure-promoting action of somatic inhibition
Source: PubMed Central journal article supplement (PMC6420604; doi:10.1038/s41467-019-08933-4), 2019-03-15
Supplement: 41467_2019_8933_MOESM3_ESM.pdf [file 41467_2019_8933_MOESM3_ESM.pdf]

## Description of Additional Supplementary Files

File Name: Supplementary Movie 1

Description: **Simultaneous ECoG and video recorded during pilocarpine-induced seizures.** Simultaneous ECoG and video recordings were made during seizures induced by a pilocarpine injection into the mouse primary visual cortex. The animal is having motor manifestations during short ictal discharges; prolonged seizure activity is accompanied by rearing.
